# Supplementary material
Source: Research Square preprint supplement (doi:10.21203/rs.3.rs-9365370/v1)
Supplement: Supplementary file 1 [file 7ee2e52d59112e3188a7ef13.docx]

**Supplementary File 1**

**Data Collection Instruments (English Language Version)**

*Developing Drug System Standards in Primary Care Units Using the SMART Model:*

*A Participatory Action Research Study in Northern Thailand*

**Part A: Primary Pharmacy Standard Assessment Tool**

***Instrument description***

This instrument was developed by the research team for the present study, adapted from the national Primary Health Care Quality Standards Manual (Ministry of Public Health, Thailand, B.E. 2566/2023). It comprises 79 binary-scored items (0 = absent/not performed; 1 = present/performed) distributed across five domains: (1) Drug System Management; (2) Drug Selection and Dispensing Quality; (3) Pharmaceutical Inventory Management; (4) Rational and Safe Drug Use; and (5) Consumer Health Protection. Content validity was established by three expert primary care pharmacists and members of the Phayao Provincial Primary Pharmacy Development Committee (Index of Item-Objective Congruence = 0.87). Internal consistency reliability was assessed through pilot testing in nine primary care units in Mae Chai District, Phayao Province (Cronbach's alpha = 0.83). Assessment is conducted by a trained pharmacist assessor in collaboration with the facility's designated registered nurse, through direct observation, document review, and record inspection.

| **No.** | **Assessment Item** | **Score 0 (Absent / Not performed)** | **Score 1 (Present / Performed)** | **Evaluator Notes** |
| --- | --- | --- | --- | --- |
| **Domain 1: Drug System Management** *(Maximum score: 3)* | | | | |
| 1.1 | The PCU has a written policy or operational framework designating responsible personnel for drug system management. | Absent | Present |  |
| 1.2 | The PCU maintains a current, approved drug list (formulary) relevant to its service population and scope of care. | Absent | Present | Verify document date |
| 1.3 | There is a designated storage area for medications that meets minimum standards for temperature, light, and security. | Not compliant | Compliant | Observe storage conditions |
| **Domain 2: Drug Selection and Dispensing Quality** *(Maximum score: 8)* | | | | |
| 2.1 | Medications are dispensed only by authorized personnel according to a physician's prescription or approved standing order. | Not performed | Performed | Review dispensing records |
| 2.2 | Dispensed medications are labeled with: patient name, drug name, strength, dose, frequency, route, and duration. | Not performed | Performed | Spot-check 5 dispensed labels |
| 2.3 | Verbal counseling on medication use, expected effects, and storage is provided to each patient at the point of dispensing. | Not performed | Performed | Observe dispensing encounter |
| 2.4 | A record of drug allergies and adverse drug reactions is maintained for each patient in their medical file. | Not maintained | Maintained | Check 10 patient records |
| 2.5 | High-alert medications (e.g., warfarin, insulin, concentrated electrolytes) are stored separately and labeled with warning stickers. | Not performed | Performed | Observe storage area |
| 2.6 | A patient registry for individuals receiving high-alert medications (especially warfarin) is maintained and regularly updated. | Not maintained | Maintained |  |
| 2.7 | Patients receiving high-alert medications are called back for follow-up at scheduled intervals. | Not performed | Performed | Review appointment records |
| 2.8 | Procedures for reporting and documenting adverse drug events (ADEs) and medication errors are in place and used. | Not in place | In place and used |  |
| **Domain 3: Pharmaceutical Inventory Management** *(Maximum score: 31)* | | | | |
| 3.1 | A complete, current inventory list of all medicines stored at the PCU is available and updated regularly. | Not available | Available |  |
| 3.2 | Medicines are stored in appropriate conditions (temperature, humidity, light) with evidence of regular monitoring. | Not performed | Performed | Check temperature log |
| 3.3 | Refrigerated medicines (e.g., vaccines, insulin) are stored in a dedicated functional refrigerator with temperature records. | Not met | Met | Check refrigerator log |
| 3.4 | Medicines are organized and dispensed using a First-In–First-Out (FIFO) or First-Expired–First-Out (FEFO) system. | Not applied | Applied | Observe storage arrangement |
| 3.5 | The expiry dates of all medicines are checked at least monthly and documented. | Not performed | Performed | Review monthly check record |
| 3.6 | Expired medicines are physically separated, clearly labeled, and disposed of according to official procedures. | Not performed | Performed |  |
| 3.7 | The percentage of expired medicines at time of assessment does not exceed 1% of total stock by value. | Exceeds 1% | ≤1% | Calculate from inventory |
| 3.8 | Medicine stock-out episodes in the previous 3 months are documented and did not exceed the acceptable threshold. | Not documented / exceeded | Documented / within threshold |  |
| 3.9 | A reorder point and minimum/maximum stock level is defined for each essential medicine at the PCU. | Not defined | Defined |  |
| 3.10 | Medicine procurement follows the approved essential medicines list and district-level procurement system. | Not followed | Followed |  |
| 3.11 | Medicine receipt is documented with batch number, expiry date, quantity, and date of receipt. | Not documented | Documented |  |
| 3.12 | Narcotic and psychotropic medicines are stored in a locked cabinet and managed with a dedicated controlled substance register. | Not met | Met |  |
| 3.13 | The controlled substance register is complete, current, and accounts for all disbursements and balances. | Not complete | Complete |  |
| 3.14 | Medicine return or destruction records for controlled substances are maintained as required by law. | Not maintained | Maintained |  |
| 3.15 | A physical stock count is conducted at least quarterly and reconciled against the inventory system. | Not performed | Performed |  |
| 3.16 | Medicine storage areas are clean, organized, and free from pests, moisture, and direct sunlight. | Not met | Met | Observe storage area |
| 3.17 | Flammable or hazardous materials (e.g., ethanol, disinfectants) are stored separately from medicines. | Not met | Met |  |
| 3.18 | Emergency medicines are stocked according to the district-approved emergency drug list and are within expiry. | Not stocked / expired | Stocked and within expiry |  |
| 3.19 | An emergency drug checklist is reviewed and documented at least monthly. | Not performed | Performed |  |
| 3.20 | Real-time or near-real-time medicine stock data are accessible to both PCU and district-level staff. | Not accessible | Accessible |  |
| 3.21 | The PCU has a documented procedure for requesting emergency replenishment of medicines from the district hospital. | Not documented | Documented |  |
| 3.22 | Medicine labeling meets national standards: drug name, strength, lot number, expiry date, and storage conditions. | Not met | Met |  |
| 3.23 | Patient-dispensed medicine packaging is appropriate and leak-proof for liquid preparations. | Not met | Met | Spot-check samples |
| 3.24 | Sample medicines or donated medicines are managed and documented separately. | Not performed | Performed |  |
| 3.25 | An annual medicine utilization review report is prepared and used for procurement planning. | Not prepared | Prepared |  |
| 3.26 | Medicines near expiry (within 3 months) are flagged and action is taken to utilize or return them. | Not performed | Performed |  |
| 3.27 | Storage area access is restricted to authorized personnel only. | Not restricted | Restricted |  |
| 3.28 | A record of medicine wastage (breakage, spillage, temperature excursion) is maintained. | Not maintained | Maintained |  |
| 3.29 | Immunological/biological products (vaccines) are managed under a documented cold chain protocol. | Not performed | Performed | Check vaccine cold chain record |
| 3.30 | Medicine inventory data are used for forecasting and submitted to the district on schedule. | Not performed | Performed |  |
| 3.31 | The PCU maintains a master list of approved generic drug names and does not procure unregistered products. | Not maintained | Maintained |  |
| **Domain 4: Rational and Safe Drug Use (RDU)** *(Maximum score: 20)* | | | | |
| 4.1 | Antibiotic prescribing rate for upper respiratory tract infection (URTI) meets the national standard (≤20%). | Does not meet (>20%) | Meets (≤20%) | Calculate from 3-month data |
| 4.2 | Antibiotic prescribing rate for acute diarrhea meets the national standard (≤10%). | Does not meet (>10%) | Meets (≤10%) | Calculate from 3-month data |
| 4.3 | The rate of injection use for conditions not requiring injections meets the national standard (≤10%). | Does not meet | Meets |  |
| 4.4 | Average number of medicines per prescription meets the national standard (≤2 items for outpatient primary care). | Does not meet | Meets |  |
| 4.5 | The PCU participates in an RDU educational activity (training, workshop, or self-study) at least once per year. | Not participated | Participated |  |
| 4.6 | Drug use data (antibiotic rates, injection rates) are collected, analyzed, and reported to the district at least quarterly. | Not performed | Performed |  |
| 4.7 | There is a protocol for managing patients with drug allergies, including allergy documentation and alert systems. | Not in place | In place |  |
| 4.8 | Patients with chronic diseases receive medication counseling (on adherence, side effects, storage) at each dispensing encounter. | Not performed | Performed |  |
| 4.9 | The PCU displays consumer health education materials about rational drug use in a visible patient area. | Not displayed | Displayed |  |
| 4.10 | Staff can correctly explain the definition of rational drug use and at least three core RDU indicators. | Cannot | Can | Assess 2 staff members |
| 4.11 | Generic medicines are prescribed and dispensed by preference in accordance with national RDU policy. | Not followed | Followed |  |
| 4.12 | Medicines are not prescribed or dispensed for conditions that do not require pharmacological treatment (e.g., self-limiting URTI). | Not followed | Followed |  |
| 4.13 | A system is in place to monitor and follow up patients who may have experienced adverse drug reactions. | Not in place | In place |  |
| 4.14 | The PCU reports suspected adverse drug reactions to the national pharmacovigilance system (via the national reporting form). | Not performed | Performed |  |
| 4.15 | Prescriptions are written legibly (or in an electronic system) and include all required elements: drug name, dose, frequency, duration, and prescriber signature. | Not met | Met | Review 10 prescriptions |
| 4.16 | Verbal prescriptions are documented immediately and countersigned within 24 hours. | Not performed | Performed |  |
| 4.17 | Staff are aware of and can correctly identify medicines on the national high-alert medication list. | Not aware | Aware | Assess 2 staff members |
| 4.18 | The PCU provides at least one community-level health education activity on rational medicine use per year. | Not performed | Performed |  |
| 4.19 | Patients receiving medicines for non-communicable diseases (NCDs) have their medication refill adherence documented. | Not documented | Documented |  |
| 4.20 | The average number of medicine types used per patient per month in NCD patients is within acceptable range. | Not monitored | Monitored and within range |  |
| **Domain 5: Consumer Health Protection** *(Maximum score: 17)* | | | | |
| 5.1 | The PCU has a designated consumer health protection officer (or equivalent) with documented responsibilities. | Not designated | Designated |  |
| 5.2 | The PCU conducts community surveillance of food and consumer products at least twice per year. | Not performed | Performed | Review surveillance records |
| 5.3 | A record of food and product complaints received from the community is maintained. | Not maintained | Maintained |  |
| 5.4 | Illegal or unsafe food additives (e.g., borax, formalin, prohibited dyes) are tested at local food establishments at least annually. | Not performed | Performed |  |
| 5.5 | Testing kits for common food hazards are available and in working condition at the PCU. | Not available | Available | Inspect kits and expiry |
| 5.6 | Community health volunteers (CHVs) are trained in consumer health protection activities. | Not trained | Trained | Review training record |
| 5.7 | The PCU maintains an updated inventory of food establishments and consumer product sellers in its catchment area. | Not maintained | Maintained |  |
| 5.8 | A system exists for reporting consumer health violations to the district or provincial authority. | Not in place | In place |  |
| 5.9 | Staff can correctly explain consumer health protection laws relevant to primary care (e.g., Food Act, Drug Act, Consumer Protection Act). | Cannot | Can | Assess 2 staff |
| 5.10 | Health education materials on food safety and consumer product hazards are displayed in the PCU. | Not displayed | Displayed |  |
| 5.11 | The PCU provides at least one community health education activity on consumer protection per year. | Not performed | Performed |  |
| 5.12 | Results of food and product surveillance are reported to relevant authorities within the required timeframe. | Not reported | Reported |  |
| 5.13 | The PCU has received no substantiated consumer complaint requiring regulatory action in the preceding 12 months. | Complaint received / unresolved | No substantiated complaint |  |
| 5.14 | Cosmetic and personal care products sold in the catchment area are sampled and checked for prohibited substances at least annually. | Not performed | Performed |  |
| 5.15 | Herbal products and traditional medicines used in the community are monitored for safety and registered status. | Not monitored | Monitored |  |
| 5.16 | Adverse events related to food or consumer products are documented and reported to the district. | Not performed | Performed |  |
| 5.17 | The PCU collaborates with local government and community organizations on at least one consumer health protection initiative per year. | Not performed | Performed |  |
| **Scoring:** Each item is scored 0 (absent/not performed) or 1 (present/performed). Domain scores are the sum of item scores. The composite score is the sum of all 79 items (maximum = 79). The national passing threshold is ≥80% of the total possible score (≥63 points out of 79). PCU = primary care unit; NCD = non-communicable disease; FIFO = first in, first out; FEFO = first expired, first out; CHV = community health volunteer; RDU = rational drug use; URTI = upper respiratory tract infection. | | | | |

**Part B: Semi-Structured Interview and Focus Group Guide**

***Instrument description***

This interview guide was developed de novo for the present study. It was used in in-depth semi-structured interviews with healthcare workers (n = 15) and NCD patients (n = 28) at all five participating primary care units, and in focus group discussions at the completion of the intervention. Interviews were conducted in Thai by the principal investigator (SL). Probing prompts were used flexibly based on participant responses. All interviews were audio-recorded with prior written consent and transcribed verbatim. Quotations were translated from Thai to English and back-translated by a bilingual researcher to verify accuracy.

| **No.** | **Participant Group** | **Core Interview Question** | **Key Probing Prompts** |
| --- | --- | --- | --- |
| HW1 | Healthcare workers (SPHP director, registered nurse, public health officer) | In your view, what should be the role and responsibilities of a primary care pharmacist in managing the drug system at your facility, according to the primary pharmacy standard? | • What specific tasks do you think a pharmacist should do that are currently unmet?  • How do you see the pharmacist's role differing from your current responsibilities?  • Are there any areas of the drug system where you feel most in need of pharmacist support? |
| HW2 | Healthcare workers | What do you expect or need pharmacists to do to support drug system management and consumer health protection at your primary care unit? | • What would a pharmacist do during a site visit that would be most useful to you?  • Are there any documentation or reporting tasks where you need pharmacist guidance?  • What training topics would most help your staff in managing medicines correctly? |
| HW3 | Healthcare workers | What challenges do you currently face in managing the drug system and meeting the primary pharmacy standard at your facility? | • What are the main barriers to maintaining adequate medicine stock?  • Have you experienced difficulties with record-keeping or data reporting?  • How do medicine stock-outs affect patient care at your facility?  • How does the absence of an on-site pharmacist affect day-to-day work? |
| HW4 | Healthcare workers | How has the SMART model intervention (training, pharmacist visits, standard operating procedures, and committee meetings) affected your work and the drug system at your facility? | • Which SMART model component was most helpful and why?  • What has changed in how you manage medicines since the intervention began?  • What has been difficult or unchanged despite the intervention? |
| PT1 | NCD patients receiving continuous care (≥1 year) | How do you feel about the pharmaceutical services you receive at this primary care unit? What is working well and what could be improved? | • Do you usually receive all your medicines without running out?  • Do staff explain how to take your medicines clearly?  • Do you have concerns about your medicines that you have not been able to ask about? |
| PT2 | NCD patients | What would you want a pharmacist to do for you if one were available at this facility or in your community? | • Would you prefer pharmacist visits to the community, or coming to the facility?  • What information about your medicines would you most like to receive?  • Have you ever experienced a problem with your medicines (wrong dose, side effects, running out)? How was it handled? |
| **Notes:** HW = healthcare worker question; PT = patient question. All interviews were conducted in Thai by the principal investigator (SL). Core questions were asked of all participants in each group. Probing prompts were used flexibly to encourage elaboration. Patient interviews (PT1–PT2) were also asked of participants about their general experience and expectations regarding consumer health protection services at the PCU. NCD = non-communicable disease; SPHP = subdistrict health promoting hospital; PCU = primary care unit. | | | |
